# Supplementary material for: RNA-seq analysis of the whole transcriptome of MDA-MB-231 mammary carcinoma cells exposed to the antimetastatic drug NAMI-A
Source: Royal Society of Chemistry journal article supplement (doi:10.1039/c5mt00081e), 2015-01-01
Supplement: c5mt00081e1.pdf [file c5mt00081e1.pdf]

Table 1. Number and percentage of read mapping on annotated genes in the human genome Ensembl release 68.

| Cell line                 | Time of analysis | Sample                    | Replicate | Number of reads | % Mapping |
|---------------------------|------------------|---------------------------|-----------|-----------------|-----------|
| <b>MDA-MB-231</b>         | 0 h p.t.         | Control                   | 1         | 16826849        | 86.25     |
|                           |                  |                           | 2         | 14594210        | 84.22     |
|                           |                  | NAMI-A 10 <sup>-5</sup> M | 1         | 16646002        | 87.37     |
|                           |                  |                           | 2         | 16764900        | 87.36     |
|                           |                  | NAMI-A 10 <sup>-4</sup> M | 1         | 17835539        | 86.93     |
|                           |                  |                           | 2         | 17742291        | 86.89     |
|                           | 20 h p.t.        | Control                   | 1         | 18518453        | 84.79     |
|                           |                  |                           | 2         | 18642847        | 84.79     |
|                           |                  | NAMI-A 10 <sup>-5</sup> M | 1         | 17051745        | 85.32     |
|                           |                  |                           | 2         | 17135389        | 85.32     |
| NAMI-A 10 <sup>-4</sup> M |                  | 1                         | 19760804  | 84.40           |           |
|                           |                  | 2                         | 19843079  | 84.40           |           |
| <b>HBL-100</b>            | 0 h p.t.         | Control                   | 1         | 18053408        | 85.15     |
|                           |                  |                           | 2         | 18178808        | 85.12     |
|                           |                  | NAMI-A 10 <sup>-5</sup> M | 1         | 17791209        | 85.42     |
|                           |                  |                           | 2         | 17884981        | 85.41     |
|                           |                  | NAMI-A 10 <sup>-4</sup> M | 1         | 16609765        | 85.02     |
|                           |                  |                           | 2         | 16725749        | 85.00     |
|                           | 20 h p.t.        | Control                   | 1         | 17956330        | 83.99     |
|                           |                  |                           | 2         | 18119069        | 83.96     |
|                           |                  | NAMI-A 10 <sup>-5</sup> M | 1         | 17765423        | 85.05     |
|                           |                  |                           | 2         | 17555071        | 84.99     |
| NAMI-A 10 <sup>-4</sup> M |                  | 1                         | 17686943  | 84.91           |           |
|                           |                  | 2                         | 17807355  | 84.89           |           |
